# Supplementary material
Source: PubMed Central journal article supplement (PMC7096814)
Supplement: 41579_2010_BFnrmicro2452_MOESM1_ESM.pdf [file 41579_2010_BFnrmicro2452_MOESM1_ESM.pdf]

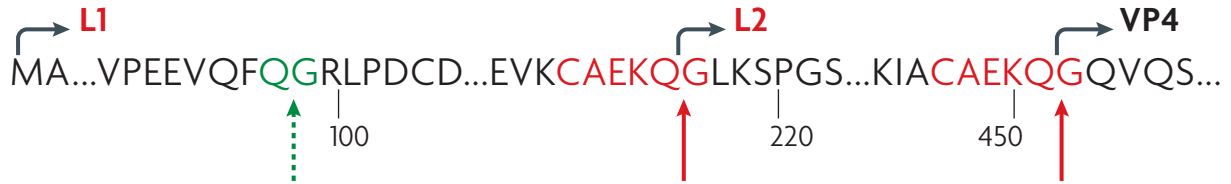

Supplementary information S1 | **A fragment of the amino acid sequence of the avian sapelovirus L protein.** This protein, usually considered to be a single entity, is likely represented by at least two distinct polypeptides. In addition to the already proposed cleavage site for the viral protease 3Cpro, which separates L and VP4 proteins, there is an identical site between positions 215 and 216 of the L sequence (highlighted in red together with some flanking residues) as predicted by the NetPicoRNA 1.0 program (<http://www.cbs.dtu.dk/services/NetPicoRNA>). Accordingly, we propose that 3Cpro recognizes this site as well, generating two leader proteins, L1 and L2. It may be noted that the L1 sequence contains still another potential cleavage site, QG (green), which however has different flanking amino acids. Additional information is needed to judge whether it can be recognized by 3Cpro.
